# Supplementary material for: A global carbon and nitrogen isotope perspective on modern and ancient human diet
Source: PubMed Central journal article supplement — Proc Natl Acad Sci U S A. 2021 May 3;118(19):e2024642118. doi: 10.1073/pnas.2024642118 (PMC8126777; doi:10.1073/pnas.2024642118), 2021-05-03
Supplement: pnas.2024642118.sapp.pdf [file pnas.2024642118.sapp.pdf]

Supplementary Figures

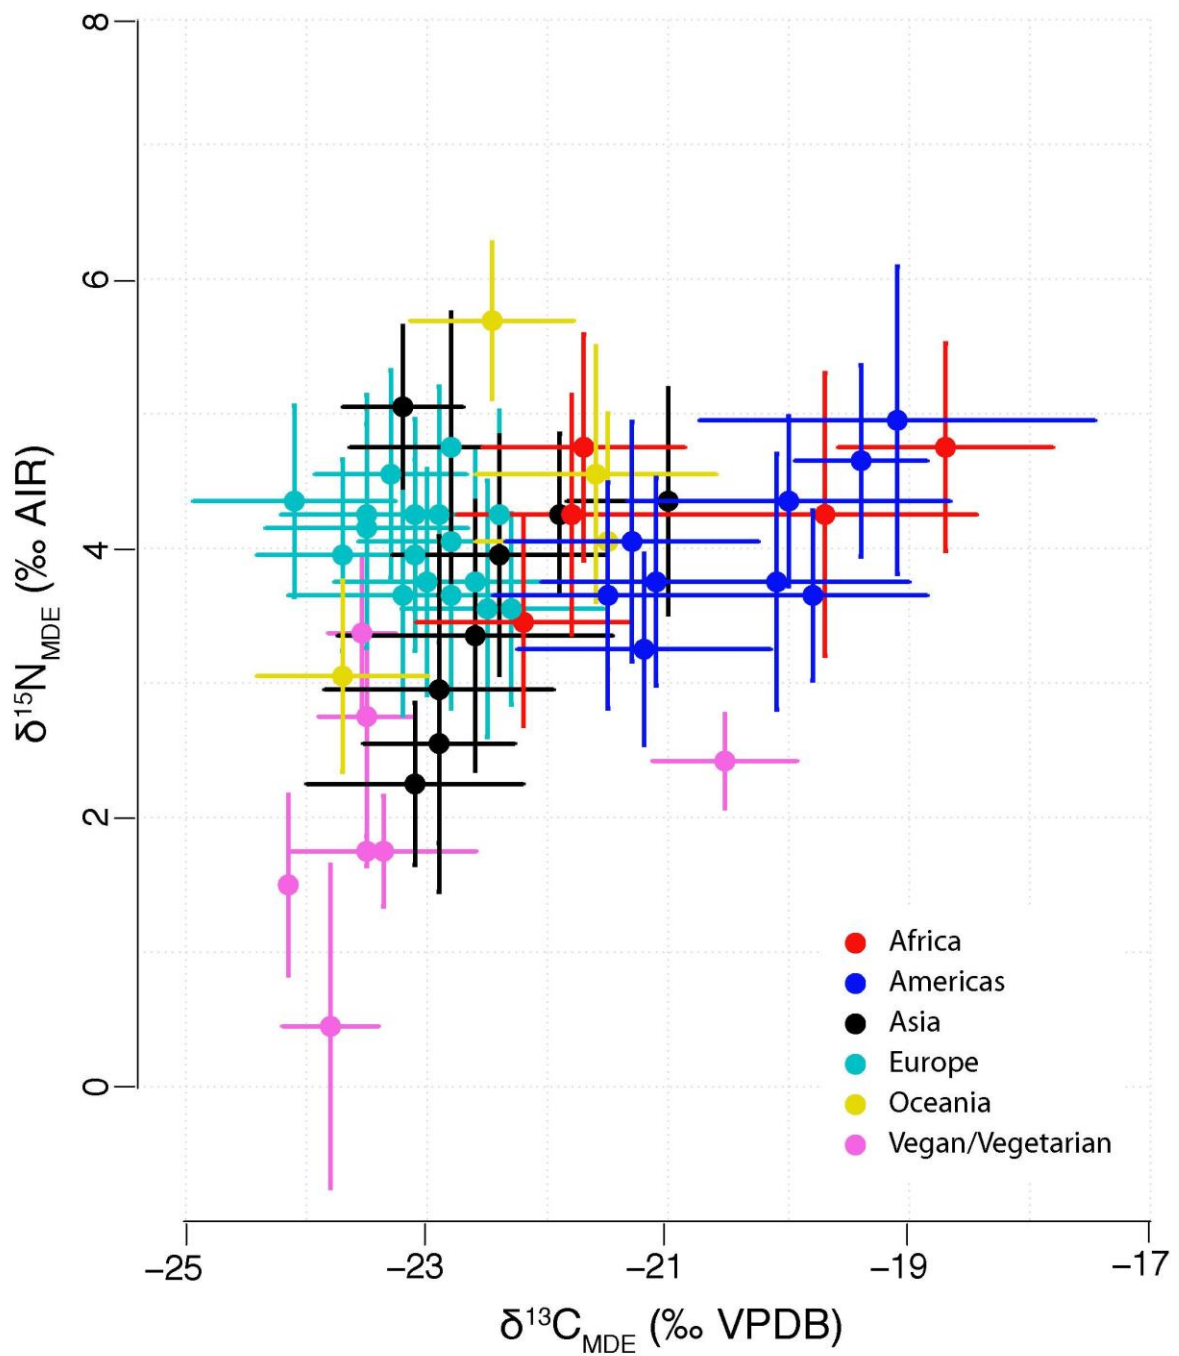

**Supplementary Figure 1.**  $\delta^{13}\text{C}_{\text{MDE}}$  and  $\delta^{15}\text{N}_{\text{MDE}}$  of modern non-subsistence populations ( $\mu$ ) with error bars ( $2\sigma$ ) and grouped by continent, using the country groupings identified by **Hulsemann et al, (2015)**. Vegans and vegetarians are shown separately (in pink).

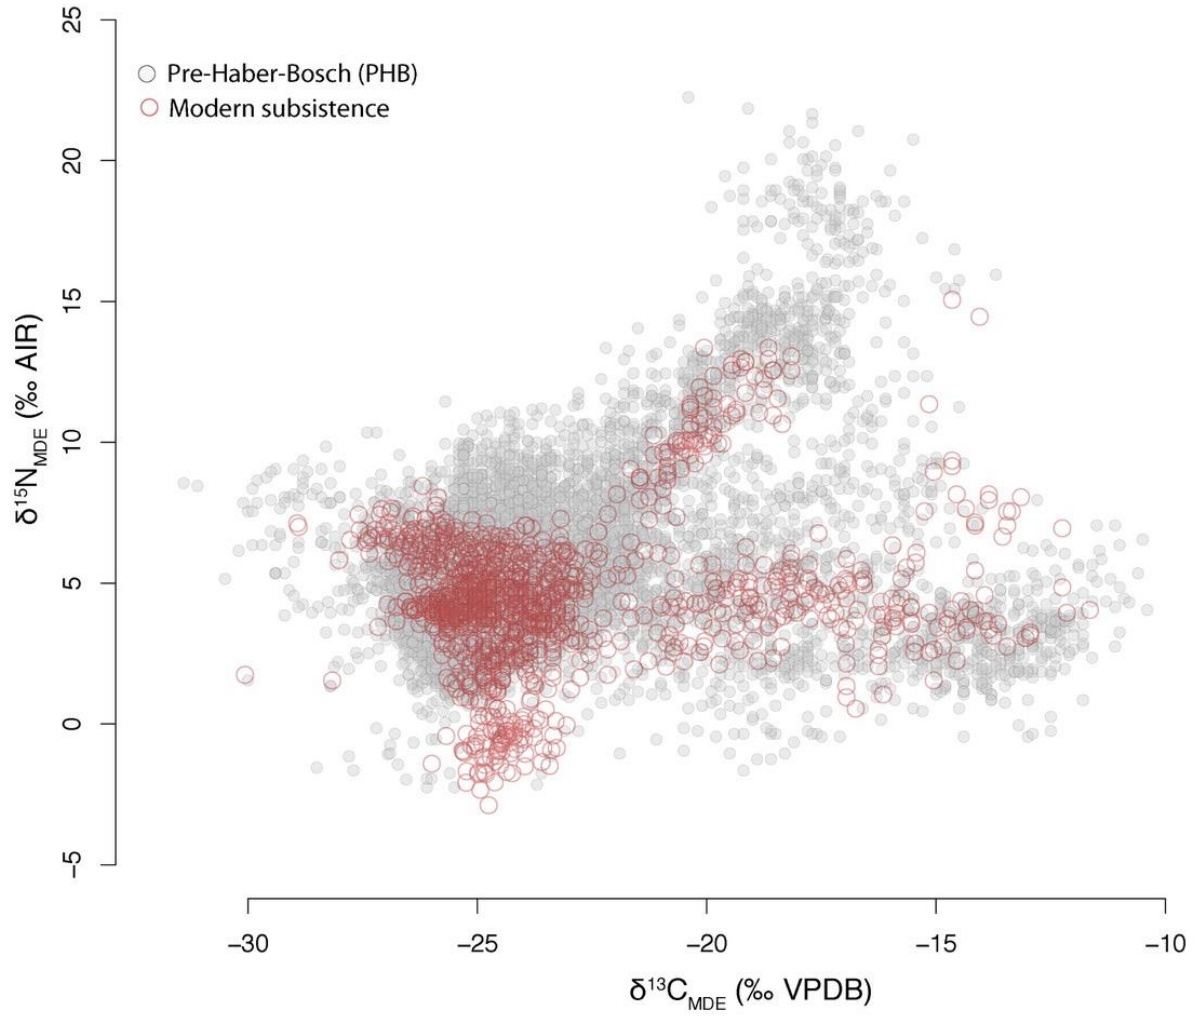

**Supplementary Figure 2.**  $\delta^{13}\text{C}_{\text{MDE}}$  and  $\delta^{15}\text{N}_{\text{MDE}}$  values of all individual modern subsistence (red) and non-subistence (grey) data points. Isotope values are reported relative to the international reference scales of AIR for nitrogen and Vienna PeeDee Belemnite (VPDB) for carbon.
